# Supplementary material
Source: PubMed Central journal article supplement (PMC10503538)
Supplement: NIHMS1930010-supplement-S1.pdf [file NIHMS1930010-supplement-S1.pdf]

1 **Supplemental Material**

2

3 **Urinary glyphosate and AMPA levels in a cross-sectional study of**  
4 **postmenopausal women: associations with organic eating behavior and dietary**  
5 **intake**

6 Rachel M. Lucia<sup>1</sup>, Xiyue Liao, Ph.D.<sup>2</sup>, Wei-Lin Huang, M.S.<sup>1</sup>, Danielle Forman<sup>3</sup>, Alexis Kim<sup>3</sup>, Argyrios Ziogas,  
7 Ph.D.<sup>3</sup>, Trina M. Norden-Krichmar, Ph.D.<sup>1</sup>, Deborah Goodman, M.D., Ph.D., M.P.H.<sup>1</sup>, Andrea Alvarez<sup>3</sup>,  
8 Irene Masunaka, M.S.<sup>4</sup>, Khyatiben V. Pathak, Ph.D.<sup>5,6</sup>, Marissa McGilvrey<sup>5,6</sup>, Apurva M. Hegde, M.S.<sup>5,6</sup>,  
9 Patrick Pirrotte, Ph.D.<sup>5,6</sup>, Hannah Lui Park, Ph.D.<sup>1,3\*</sup>

10 <sup>1</sup>Department of Epidemiology and Biostatistics, University of California, Irvine, CA, USA

11 <sup>2</sup>Department of Mathematics and Statistics, California State University, Long Beach, CA, USA

12 <sup>3</sup>Department of Pathology and Laboratory Medicine, University of California, Irvine, CA, USA

13 <sup>4</sup>Department of Medicine, University of California, Irvine, CA, USA

14 <sup>5</sup>Integrated Mass Spectrometry Shared Resource, City of Hope Comprehensive Cancer Center, Duarte, CA, USA

15 <sup>6</sup>Cancer & Cell Biology Division, Translational Genomics Research Institute, Phoenix, AZ, USA

16 \*Correspondence: Tel: (949) 824-2651; E-mail: [hlpark@uci.edu](mailto:hlpark@uci.edu); Address: 839 Health Sciences Road, 218 Sprague  
17 Hall, Irvine, CA 92617

|    |                                                                                                                |
|----|----------------------------------------------------------------------------------------------------------------|
| 18 | <b>Table of Contents</b>                                                                                       |
| 19 | <b>Supplemental Text</b>                                                                                       |
| 20 | List of food and beverage items included in additional categories                                              |
| 21 |                                                                                                                |
| 22 |                                                                                                                |
| 23 | <b>Supplemental Tables</b>                                                                                     |
| 24 | <b>Supplemental Table 1.</b> Self-reported organic eating frequencies for six food groups                      |
| 25 | <b>Supplemental Table 2.</b> Association of demographic/behavioral variables with urinary glyphosate and       |
| 26 | AMPA levels                                                                                                    |
| 27 | <b>Supplemental Table 3.</b> Association of quartile of consumption of major food groups with urinary          |
| 28 | glyphosate and AMPA, stratified by self-reported food-group-specific organic eating habits                     |
| 29 | <b>Supplemental Table 4.</b> Sensitivity analysis: association of dietary and demographic/behavioral variables |
| 30 | with glyphosate and AMPA levels, excluding poor-quality dietary recalls                                        |
| 31 |                                                                                                                |

32

33 **List of food and beverage items included in additional categories**

**Corn**

---

Corn flakes, NFS  
Corn Puffs  
Corn, cooked, NS as to form, NS as to color, NS as to fat added in cooking  
Corn, dried, cooked  
Corn, white, cooked  
Corn, yellow and white, cooked  
Corn, yellow, cooked  
Cornbread, made from home recipe  
Cornbread, prepared from mix  
Grits, cooked, corn or hominy, instant, fat not added in cooking  
Mixed vegetables (corn, lima beans, peas, green beans, and carrots), cooked  
Peas and corn, cooked, fat not added in cooking  
Popcorn, any type  
Salty snacks, corn based puffs and twists, cheese puffs and twists, lowfat  
Salty snacks, corn or cornmeal base, corn chips, corn-cheese chips  
Salty snacks, corn or cornmeal base, corn puffs and twists  
Corn-cheese puffs and twists  
Salty snacks, corn or cornmeal base, nuts or nuggets, toasted  
Salty snacks, corn or cornmeal base, tortilla chips  
Taco shell, corn  
Tortilla, corn

**Oats**

---

Bread, oat bran, toasted  
Bread, oatmeal  
Cheerios  
Cookie, oatmeal  
Cookie, oatmeal, with raisins  
Cracklin' Oat Bran  
Granola bar, lowfat, NFS  
Granola bar, NFS  
Granola bar, reduced sugar, NFS  
Granola with Raisins, lowfat, Kellogg's  
Granola, homemade  
Granola, lowfat, Kellogg's  
Granola, NFS  
Honey Bunches of Oats Honey Roasted Cereal  
Honey Bunches of Oats with Almonds, Post  
Honey Nut Cheerios

MultiGrain Cheerios  
Nature Valley Chewy Trail Mix Granola Bar  
Nature Valley Crunchy Granola Bar  
Nature Valley Granola, with fruit and nuts  
Nature Valley Sweet and Salty Granola Bar  
Oatmeal, cooked, any type  
Oats, raw  
Quaker Chewy Granola Bar  
Quaker Oatmeal Squares (formerly Quaker Oat Squares)  
Snack bar, oatmeal

## **Soy**

---

Balance Original Bar  
Boost, nutritional drink, ready-to-drink  
Breakfast link, pattie, or slice, meatless  
Chicken, meatless, breaded, fried  
Clif Bar  
Coffee, latte W/ SOY MILK  
Coffee, latte, W/ SOY MILK, decaffeinated  
Edamame  
Ensure Plus, nutritional shake, ready-to-drink  
Herbalife, nutritional shake mix, high protein, powder  
Kashi GOLEAN  
Kashi GOLEAN Crunch Honey Almond Flax  
Milk, soy, any type  
Nutrition bar or meal replacement bar, NFS  
Nutritional drink or meal replacement, ready-to-drink, NFS  
PowerBar  
Protein powder, soy based, NFS  
Slim Fast Original Meal Bar  
Soybean curd  
Soybean curd, deep fried  
Soybean soup, miso broth  
Tea, NS as to type, unsweetened, W/ SOY MILK  
Tiger's Milk bar  
Tofu and vegetables (including carrots, broccoli, and/or dark-green leafy vegetables (no potatoes)), with soy-based sauce (mixture)  
Vegetarian burger or patty, meatless, no bun  
Vegetarian burrito (made with meat substitute)  
Vegetarian stroganoff (made with meat substitute)

## **Coffee**

---

Blended coffee beverage, made with regular coffee, milk, and ice, sweetened  
Cafe con leche  
Cafe con leche prepared with sugar

Cappuccino  
Cappuccino W/ 2% MILK  
Cappuccino, decaffeinated  
Coffee and cocoa (mocha), made from powdered instant mix, with whitener, presweetened  
Coffee, decaffeinated, made from ground  
Coffee, decaffeinated, made from powdered instant  
Coffee, espresso  
Coffee, espresso, decaffeinated  
Coffee, Latte  
Coffee, latte W/ 1% MILK  
Coffee, latte W/ 2% MILK  
Coffee, latte W/ SKIM MILK  
Coffee, latte W/ WHOLE MILK  
Coffee, latte, decaffeinated W/ 2% MILK  
Coffee, latte, decaffeinated W/ SKIM MILK  
Coffee, made from ground, equal parts regular and decaffeinated  
Coffee, made from ground, regular  
Coffee, made from liquid concentrate  
Coffee, made from powdered instant mix, with whitener and low calorie sweetener  
Coffee, made from powdered instant mix, with whitener and sugar, instant  
Coffee, made from powdered instant, 50% less caffeine  
Coffee, made from powdered instant, regular  
Coffee, mocha  
Coffee, mocha W/ WHOLE MILK  
Coffee, regular, NS as to ground or instant  
Coffee, regular, presweetened with sugar, pre-lightened

## Tea

---

Half and Half beverage, half iced tea and half fruit juice drink (lemonade)  
Tea, herbal  
Tea, herbal, presweetened with low calorie sweetener  
Tea, herbal, presweetened with sugar  
Tea, hibiscus  
Tea, leaf, decaffeinated, presweetened, NS as to sweetener  
Tea, leaf, decaffeinated, unsweetened  
Tea, leaf, presweetened with low calorie sweetener  
Tea, leaf, presweetened with sugar  
Tea, leaf, presweetened, NS as to sweetener  
Tea, leaf, unsweetened  
Tea, made from powdered instant, unsweetened  
Tea, NS as to type, decaffeinated, presweetened with sugar  
Tea, NS as to type, presweetened with low calorie sweetener  
Tea, NS as to type, presweetened with sugar  
Tea, NS as to type, presweetened, NS as to sweetener

Tea, NS as to type, unsweetened

**Wine**

---

Brandy

Wine cooler

Wine, dessert, sweet

Wine, rice

Wine, table, red

Wine, table, white

**Beer**

---

Beer, lite

Alcoholic malt beverage, sweetened

**Spirits**

---

Cocktail, NFS

Gin

Gin and Tonic

Liqueur with cream

Margarita

Martini

Rum

Vodka

Whiskey

34

35

36 **Supplemental Table 1.** Self-reported organic eating frequencies for six food groups, overall and stratified by  
 37 overall organic eating habits.

|                   | Total<br>N (%) | Overall Organic Eating |                    |                       |
|-------------------|----------------|------------------------|--------------------|-----------------------|
|                   |                | Often/Always<br>N (%)  | Sometimes<br>N (%) | Seldom/Never<br>N (%) |
| <b>Fruit</b>      |                |                        |                    |                       |
| Often/Always      | 112 (33.1%)    | 96 (75.0%)             | 16 (15.7%)         | 0 (0.0%)              |
| Sometimes         | 79 (23.4%)     | 23 (18.0%)             | 56 (54.9%)         | 0 (0.0%)              |
| Seldom/Never      | 143 (42.3%)    | 6 (4.7%)               | 29 (28.4%)         | 108 (100.0%)          |
| Do not consume    | 4 (1.2%)       | 3 (2.3%)               | 1 (1.0%)           | 0 (0.0%)              |
| <b>Vegetables</b> |                |                        |                    |                       |
| Often/Always      | 110 (32.5%)    | 97 (75.8%)             | 13 (12.7%)         | 0 (0.0%)              |
| Sometimes         | 81 (24.0%)     | 25 (19.5%)             | 56 (54.9%)         | 0 (0.0%)              |
| Seldom/Never      | 146 (43.2%)    | 6 (4.7%)               | 32 (31.4%)         | 108 (100.0%)          |
| Do not consume    | 1 (0.3%)       | 0 (0.0%)               | 1 (1.0%)           | 0 (0.0%)              |
| <b>Grains</b>     |                |                        |                    |                       |
| Often/Always      | 56 (16.6%)     | 43 (33.6%)             | 13 (12.7%)         | 0 (0.0%)              |
| Sometimes         | 48 (14.2%)     | 28 (21.9%)             | 20 (19.6%)         | 0 (0.0%)              |
| Seldom/Never      | 220 (65.1%)    | 47 (36.7%)             | 65 (63.7%)         | 108 (100.0%)          |
| Do not consume    | 14 (4.1%)      | 10 (7.8%)              | 4 (3.9%)           | 0 (0.0%)              |
| <b>Meat</b>       |                |                        |                    |                       |
| Often/Always      | 61 (18.0%)     | 49 (38.3%)             | 12 (11.8%)         | 0 (0.0%)              |
| Sometimes         | 67 (19.8%)     | 36 (28.1%)             | 31 (30.4%)         | 0 (0.0%)              |
| Seldom/Never      | 188 (55.6%)    | 30 (23.4%)             | 50 (49.0%)         | 108 (100.0%)          |
| Do not consume    | 22 (6.5%)      | 13 (10.2%)             | 9 (8.8%)           | 0 (0.0%)              |
| <b>Eggs</b>       |                |                        |                    |                       |
| Often/Always      | 114 (33.7%)    | 86 (67.2%)             | 28 (27.5%)         | 0 (0.0%)              |
| Sometimes         | 33 (9.8%)      | 13 (10.2%)             | 20 (19.6%)         | 0 (0.0%)              |
| Seldom/Never      | 183 (54.1%)    | 25 (19.5%)             | 50 (49.0%)         | 108 (100.0%)          |
| Do not consume    | 8 (2.4%)       | 4 (3.1%)               | 4 (3.9%)           | 0 (0.0%)              |
| <b>Dairy</b>      |                |                        |                    |                       |
| Often/Always      | 64 (18.9%)     | 49 (38.3%)             | 15 (14.7%)         | 0 (0.0%)              |
| Sometimes         | 44 (13.0%)     | 22 (17.2%)             | 22 (21.6%)         | 0 (0.0%)              |
| Seldom/Never      | 205 (60.7%)    | 40 (31.3%)             | 57 (55.9%)         | 108 (100.0%)          |
| Do not consume    | 25 (7.4%)      | 17 (13.3%)             | 8 (7.8%)           | 0 (0.0%)              |

38  
 39 Overall organic eating was based on the response to the overall question “How often do you eat organic food?”  
 40 while food group-specific categories were based on the response to questions for each food group, i.e. “How  
 41 often do you eat organic fruit?” Individuals who responded “Seldom/Never” to the overall question were not  
 42 asked food group-specific questions.

43 **Supplemental Table 2.** Association of demographic/behavioral variables with urinary glyphosate and AMPA levels. Base model adjusted for  
 44 urinary creatinine with a random effect for individual; adjusted model additionally adjusted for average total Kcal, average recall-specific Healthy  
 45 Eating Index (HEI), race/ethnicity, and physical activity level. BMI: body mass index, AMPA: aminomethylphosphonic acid

|                                                 | Glyphosate                      |      |                                 |      | AMPA                            |              |                                 |              |
|-------------------------------------------------|---------------------------------|------|---------------------------------|------|---------------------------------|--------------|---------------------------------|--------------|
|                                                 | Base model                      |      | Adjusted model                  |      | Base model                      |              | Adjusted model                  |              |
|                                                 | Relative difference<br>(95% CI) | p    | Relative difference<br>(95% CI) | p    | Relative difference<br>(95% CI) | p            | Relative difference<br>(95% CI) | p            |
| <b>Age</b>                                      | 1.02 (0.99, 1.05)               | 0.16 | 1.02 (0.99, 1.05)               | 0.13 | 1.00 (0.97, 1.03)               | 0.89         | 1.001 (0.97, 1.03)              | 0.92         |
| <b>Race/Ethnicity</b>                           |                                 |      |                                 |      |                                 |              |                                 |              |
| <b>Non-Hispanic White</b>                       | Ref                             |      | Ref                             |      | Ref                             |              | Ref                             |              |
| <b>Asian</b>                                    | 0.81 (0.54, 1.21)               | 0.30 | 0.81 (0.54, 1.20)               | 0.29 | 1.21 (0.81, 1.81)               | 0.36         | 1.26 (0.84, 1.88)               | 0.26         |
| <b>Hispanic</b>                                 | 1.07 (0.77, 1.47)               | 0.70 | 1.04 (0.76, 1.44)               | 0.80 | 1.03 (0.75, 1.42)               | 0.85         | 1.01 (0.73, 1.39)               | 0.97         |
| <b>Other Race</b>                               | 0.60 (0.34, 1.06)               | 0.08 | 0.59 (0.33, 1.05)               | 0.07 | 0.53 (0.29, 0.94)               | <b>0.03</b>  | 0.50 (0.28, 0.90)               | <b>0.02</b>  |
| <b>Education</b>                                |                                 |      |                                 |      |                                 |              |                                 |              |
| <b>College Graduate</b>                         | Ref                             |      | Ref                             |      | Ref                             |              | Ref                             |              |
| <b>Some College</b>                             | 1.05 (0.78, 1.42)               | 0.74 | 0.97 (0.71, 1.32)               | 0.85 | 1.17 (0.87, 1.57)               | 0.31         | 1.09 (0.80, 1.49)               | 0.58         |
| <b>High School Graduate</b>                     | 1.21 (0.73, 1.98)               | 0.46 | 1.11 (0.65, 1.89)               | 0.71 | 1.27 (0.77, 2.10)               | 0.35         | 1.14 (0.66, 1.94)               | 0.64         |
| <b>Some High School</b>                         | 1.83 (0.81, 4.12)               | 0.15 | 1.71 (0.73, 4.03)               | 0.22 | 0.51 (0.23, 1.14)               | 0.10         | 0.49 (0.21, 1.15)               | 0.10         |
| <b>Median Estimated Annual Household Income</b> |                                 |      |                                 |      |                                 |              |                                 |              |
| <b>Less than \$100,000</b>                      | Ref                             |      | Ref                             |      | Ref                             |              | Ref                             |              |
| <b>\$100,000 - \$149,999</b>                    | 0.95 (0.72, 1.26)               | 0.73 | 0.94 (0.71, 1.25)               | 0.71 | 1.18 (0.89, 1.56)               | 0.24         | 1.18 (0.89, 1.57)               | 0.30         |
| <b>\$150,000 or more</b>                        | 0.87 (0.63, 1.22)               | 0.43 | 0.89 (0.63, 1.26)               | 0.53 | 1.00 (0.71, 1.39)               | 0.99         | 1.06 (0.75, 1.50)               | 0.82         |
| <b>BMI</b>                                      | 1.01 (0.99, 1.03)               | 0.25 | 1.01 (0.99, 1.03)               | 0.44 | 1.01 (0.99, 1.03)               | 0.17         | 1.01 (0.99, 1.03)               | 0.25         |
| <b>Physical Activity</b>                        |                                 |      |                                 |      |                                 |              |                                 |              |
| <b>&lt;150 minutes/week</b>                     | Ref                             |      | Ref                             |      | Ref                             |              | Ref                             |              |
| <b>≥150 minutes/week</b>                        | 0.77 (0.61, 0.98)               | 0.03 | 0.77 (0.61, 0.98)               | 0.04 | 0.83 (0.66, 1.06)               | 0.14         | 0.87 (0.68, 1.10)               | 0.25         |
| <b>Smoking Status</b>                           |                                 |      |                                 |      |                                 |              |                                 |              |
| <b>Never</b>                                    | Ref                             |      | Ref                             |      | Ref                             |              | Ref                             |              |
| <b>Former</b>                                   | 1.01 (0.76, 1.34)               | 0.94 | 0.99 (0.75, 1.31)               | 0.96 | 0.80 (0.60, 1.05)               | 0.11         | 0.81 (0.61, 1.07)               | 0.13         |
| <b>Current</b>                                  | 0.78 (0.43, 1.42)               | 0.42 | 0.73 (0.40, 1.33)               | 0.31 | 0.87 (0.48, 1.58)               | 0.65         | 0.89 (0.49, 1.63)               | 0.71         |
| <b>Fast Food Meals</b>                          |                                 |      |                                 |      |                                 |              |                                 |              |
| <b>Less than 1 time/month</b>                   | Ref                             |      | Ref                             |      | Ref                             |              | Ref                             |              |
| <b>1-3 times/month</b>                          | 0.95 (0.72, 1.26)               |      | 0.89 (0.67, 1.18)               | 0.42 | 1.07 (0.81, 1.41)               | 0.62         | 0.99 (0.74, 1.31)               | 0.92         |
| <b>1-3 times/week</b>                           | 1.19 (0.87, 1.64)               | 0.27 | 1.05 (0.75, 1.48)               | 0.76 | 1.24 (0.91, 1.71)               | 0.18         | 1.11 (0.79, 1.56)               | 0.55         |
| <b>4 or more times/week</b>                     | 2.14 (0.93, 4.90)               | 0.07 | 1.89 (0.82, 4.37)               | 0.14 | 3.94 (1.73, 8.98)               | <b>0.001</b> | 3.28 (1.43, 7.54)               | <b>0.006</b> |
| <b>Organic Eating Frequency</b>                 |                                 |      |                                 |      |                                 |              |                                 |              |
| <b>Seldom/Never</b>                             | 1.23 (0.93, 1.64)               | 0.15 | 1.19 (0.89, 1.59)               | 0.24 | 1.31 (0.99, 1.75)               | 0.06         | 1.20 (0.90, 1.60)               | 0.22         |
| <b>Sometimes</b>                                | 1.13 (0.85, 1.50)               | 0.42 | 1.11 (0.84, 1.49)               | 0.46 | 1.25 (0.94, 1.67)               | 0.13         | 1.21 (0.90, 1.61)               | 0.21         |
| <b>Often/Always</b>                             | Ref                             |      | Ref                             |      | Ref                             |              | Ref                             |              |
| <b>Primary Drinking Water Source</b>            |                                 |      |                                 |      |                                 |              |                                 |              |
| <b>Bottled</b>                                  | Ref                             |      | Ref                             |      | Ref                             |              | Ref                             |              |
| <b>Tap (Filtered)</b>                           | 0.94 (0.73, 1.21)               | 0.65 | 0.96 (0.74, 1.24)               | 0.74 | 0.93 (0.72, 1.20)               | 0.58         | 0.92 (0.71, 1.19)               | 0.52         |
| <b>Tap (Unfiltered)</b>                         | 0.95 (0.62, 1.46)               | 0.82 | 0.92 (0.59, 1.42)               | 0.70 | 0.73 (0.48, 1.13)               | 0.16         | 0.71 (0.46, 1.10)               | 0.12         |



47 **Supplemental Table 3.** Association of quartile of consumption of major food groups with urinary glyphosate and  
 48 AMPA, stratified by self-reported food-group-specific organic eating habits. Adjusted for urinary creatinine, total  
 49 Kcal, recall-specific Healthy Eating Index (HEI), race/ethnicity, and physical activity level. AMPA:  
 50 aminomethylphosphonic acid

| Food Group          | Organic Eating | Glyphosate                                         |             | AMPA                                               |            |
|---------------------|----------------|----------------------------------------------------|-------------|----------------------------------------------------|------------|
|                     |                | Relative difference<br>(95% CI), adjusted<br>model | Adjusted p  | Relative difference<br>(95% CI), adjusted<br>model | Adjusted p |
| <b>Fruit</b>        | Often/Always   | 0.91 (0.79, 1.05)                                  | 0.20        | 0.95 (0.80, 1.12)                                  | 0.52       |
|                     | Sometimes      | 1.09 (0.90, 1.33)                                  | 0.37        | 0.84 (0.68, 1.03)                                  | 0.10       |
|                     | Seldom/Never   | 0.98 (0.85, 1.14)                                  | 0.80        | 0.97 (0.82, 1.15)                                  | 0.73       |
| <b>Vegetables</b>   | Often/Always   | 0.88 (0.75, 1.03)                                  | 0.11        | 0.98 (0.83, 1.16)                                  | 0.84       |
|                     | Sometimes      | 1.06 (0.90, 1.25)                                  | 0.47        | 0.95 (0.79, 1.14)                                  | 0.56       |
|                     | Seldom/Never   | 0.96 (0.83, 1.11)                                  | 0.59        | 1.09 (0.91, 1.29)                                  | 0.36       |
| <b>Grains</b>       | Often/Always   | 1.28 (1.04, 1.57)                                  | <b>0.02</b> | 1.12 (0.88, 1.43)                                  | 0.36       |
|                     | Sometimes      | 1.14 (0.87, 1.48)                                  | 0.36        | 1.09 (0.83, 1.43)                                  | 0.53       |
|                     | Seldom/Never   | 1.13 (1.01, 1.27)                                  | <b>0.04</b> | 1.06 (0.92, 1.21)                                  | 0.44       |
| <b>Meat/Poultry</b> | Often/Always   | 0.91 (0.76, 1.10)                                  | 0.34        | 0.84 (0.70, 1.02)                                  | 0.09       |
|                     | Sometimes      | 0.88 (0.73, 1.06)                                  | 0.18        | 1.21 (0.98, 1.50)                                  | 0.08       |
|                     | Seldom/Never   | 0.88 (0.77, 0.99)                                  | <b>0.04</b> | 1.00 (0.87, 1.15)                                  | 0.99       |
| <b>Eggs</b>         | Often/Always   | 1.03 (0.91, 1.16)                                  | 0.65        | 1.00 (0.87, 1.15)                                  | 0.97       |
|                     | Sometimes      | 1.13 (0.85, 1.50)                                  | 0.42        | 0.96 (0.68, 1.36)                                  | 0.83       |
|                     | Seldom/Never   | 0.99 (0.88, 1.11)                                  | 0.83        | 1.04 (0.91, 1.20)                                  | 0.54       |
| <b>Dairy</b>        | Often/Always   | 1.02 (0.85, 1.22)                                  | 0.87        | 0.96 (0.78, 1.18)                                  | 0.70       |
|                     | Sometimes      | 0.99 (0.76, 1.29)                                  | 0.94        | 1.01 (0.77, 1.33)                                  | 0.94       |
|                     | Seldom/Never   | 0.96 (0.86, 1.08)                                  | 0.48        | 0.90 (0.79, 1.03)                                  | 0.12       |

51

52

53 **Supplemental Table 4.** Sensitivity analysis: association of dietary and demographic/behavioral variables with  
 54 urinary glyphosate and AMPA levels, excluding poor-quality dietary recalls (remaining N = 461 recalls). Adjusted  
 55 for urinary creatinine, total Kcal, recall-specific Healthy Eating Index (HEI), race/ethnicity, and physical activity  
 56 level. BMI: body mass index, AMPA: aminomethylphosphonic acid

|                                              | Glyphosate                                      |                  | AMPA                                            |                  |
|----------------------------------------------|-------------------------------------------------|------------------|-------------------------------------------------|------------------|
|                                              | Relative difference (95% CI),<br>adjusted model | Adjusted p       | Relative difference (95% CI),<br>adjusted model | Adjusted p       |
| <b>Dietary Recall Characteristics</b>        |                                                 |                  |                                                 |                  |
| <b>Major Food Groups (Quartile)</b>          |                                                 |                  |                                                 |                  |
| Fruit                                        | 0.99 (0.89, 1.10)                               | 0.86             | 0.90 (0.80, 1.01)                               | 0.08             |
| Vegetables                                   | 0.96 (0.87, 1.07)                               | 0.48             | 0.98 (0.88, 1.10)                               | 0.77             |
| Grains                                       | 1.15 (1.04, 1.28)                               | <b>0.01</b>      | 1.08 (0.96, 1.22)                               | 0.21             |
| Whole Grains                                 | 1.12 (1.02, 1.24)                               | <b>0.02</b>      | 0.97 (0.87, 1.08)                               | 0.58             |
| Refined Grains                               | 1.12 (1.00, 1.26)                               | <b>0.04</b>      | 1.19 (1.05, 1.35)                               | <b>0.01</b>      |
| Protein Foods                                | 0.90 (0.81, 0.99)                               | <b>0.03</b>      | 1.05 (0.94, 1.17)                               | 0.42             |
| Meat and Poultry                             | 0.91 (0.82, 1.00)                               | <b>0.05</b>      | 1.02 (0.91, 1.13)                               | 0.78             |
| Dairy                                        | 0.94 (0.85, 1.04)                               | 0.22             | 0.92 (0.83, 1.03)                               | 0.14             |
| <b>Selected Foods and Beverages (Yes/No)</b> |                                                 |                  |                                                 |                  |
| Legumes                                      | 1.22 (0.96, 1.55)                               | 0.10             | 0.97 (0.74, 1.27)                               | 0.81             |
| Corn                                         | 0.88 (0.71, 1.11)                               | 0.29             | 0.67 (0.52, 0.87)                               | <b>0.003</b>     |
| Oats                                         | 1.67 (1.27, 2.20)                               | <b>&lt;0.001</b> | 1.12 (0.83, 1.51)                               | 0.47             |
| Eggs                                         | 0.95 (0.76, 1.19)                               | 0.64             | 1.06 (0.82, 1.37)                               | 0.67             |
| Soy Protein                                  | 0.93 (0.71, 1.22)                               | 0.62             | 1.31 (0.97, 1.77)                               | 0.08             |
| Soy Protein, Milk, Other<br>Soy Foods        | 0.89 (0.71, 1.12)                               | 0.32             | 1.19 (0.93, 1.54)                               | 0.17             |
| Nuts and Seeds                               | 1.09 (0.87, 1.36)                               | 0.46             | 1.04 (0.81, 1.34)                               | 0.76             |
| Coffee                                       | 1.07 (0.84, 1.36)                               | 0.59             | 1.01 (0.78, 1.31)                               | 0.93             |
| Tea                                          | 0.98 (0.77, 1.23)                               | 0.83             | 1.10 (0.86, 1.42)                               | 0.44             |
| Alcohol                                      | 1.05 (0.82, 1.34)                               | 0.70             | 1.63 (1.26, 2.12)                               | <b>&lt;0.001</b> |
| Wine                                         | 1.05 (0.81, 1.37)                               | 0.71             | 1.63 (1.22, 2.16)                               | <b>0.001</b>     |
| Beer                                         | 0.84 (0.54, 1.31)                               | 0.45             | 1.37 (0.84, 2.23)                               | 0.22             |
| Spirits                                      | 1.23 (0.80, 1.89)                               | 0.35             | 1.25 (0.77, 2.02)                               | 0.36             |
| <b>Diet Quality</b>                          |                                                 |                  |                                                 |                  |
| HEI (for individual<br>dietary recall)       | 1.00 (0.99, 1.01)                               | 0.95             | 0.99 (0.99, 1.00)                               | 0.18             |
| <b>Individual Characteristics</b>            |                                                 |                  |                                                 |                  |
| Age                                          | 1.03 (1.00, 1.06)                               | 0.08             | 1.01 (0.98, 1.04)                               | 0.56             |
| <b>Race/Ethnicity</b>                        |                                                 |                  |                                                 |                  |
| Non-Hispanic White                           | Ref                                             |                  | Ref                                             |                  |
| Asian                                        | 0.73 (0.48, 1.13)                               | 0.16             | 1.08 (0.69, 1.67)                               | 0.74             |
| Hispanic                                     | 1.10 (0.78, 1.55)                               | 0.58             | 0.98 (0.69, 1.38)                               | 0.89             |
| Other Race                                   | 0.62 (0.32, 1.19)                               | 0.15             | 0.44 (0.22, 0.87)                               | <b>0.02</b>      |
| <b>Education</b>                             |                                                 |                  |                                                 |                  |
| College Graduate                             | Ref                                             |                  | Ref                                             |                  |
| Some College                                 | 0.90 (0.64, 1.25)                               | 0.52             | 1.06 (0.76, 1.48)                               | 0.74             |
| High School Graduate                         | 1.14 (0.65, 2.00)                               | 0.64             | 1.15 (0.64, 2.04)                               | 0.64             |
| Some High School                             | 1.67 (0.67, 4.15)                               | 0.27             | 0.56 (0.23, 1.41)                               | 0.22             |

|                                          |                   |      |                   |      |
|------------------------------------------|-------------------|------|-------------------|------|
| Median Estimated Annual Household Income |                   |      |                   |      |
| Less than \$100,000                      | Ref               |      | Ref               |      |
| \$100,000 - \$149,999                    | 0.99 (0.73, 1.34) | 0.95 | 1.21 (0.89, 1.63) | 0.23 |
| \$150,000 or more                        | 1.04 (0.72, 1.51) | 0.84 | 1.06 (0.73, 1.54) | 0.77 |
| BMI                                      | 1.00 (0.98, 1.02) | 0.95 | 1.01 (0.99, 1.03) | 0.57 |
| Physical Activity                        |                   |      |                   |      |
| <150 minutes/week                        | Ref               |      | Ref               |      |
| ≥150 minutes/week                        | 0.79 (0.61, 1.02) | 0.07 | 0.86 (0.67, 1.12) | 0.26 |
| Smoking Status                           |                   |      |                   |      |
| Never                                    | Ref               |      | Ref               |      |
| Former                                   | 1.04 (0.77, 1.40) | 0.79 | 0.84 (0.62, 1.14) | 0.26 |
| Current                                  | 0.79 (0.41, 1.50) | 0.47 | 0.77 (0.40, 1.49) | 0.44 |
| Fast Food Meals                          |                   |      |                   |      |
| Less than 1 time/month                   | Ref               |      | Ref               |      |
| 1-3 times/month                          | 0.83 (0.61, 1.12) | 0.22 | 0.93 (0.68, 1.27) | 0.63 |
| 1-3 times/week                           | 1.09 (0.76, 1.56) | 0.63 | 1.06 (0.74, 1.54) | 0.74 |
| 4 or more times/week                     | 1.39 (0.55, 3.49) | 0.49 | 2.06 (0.80, 5.30) | 0.13 |
| Organic Eating                           |                   |      |                   |      |
| Seldom/Never                             | 1.25 (0.91, 1.68) | 0.17 | 1.27 (0.92, 1.73) | 0.14 |
| Sometimes                                | 1.21 (0.89, 1.65) | 0.23 | 1.19 (0.86, 1.62) | 0.30 |
| Often/Always                             | Ref               |      | Ref               |      |
| Primary Drinking Water Source            |                   |      |                   |      |
| Bottled                                  | Ref               |      | Ref               |      |
| Tap (Filtered)                           | 0.93 (0.70, 1.22) | 0.60 | 0.88 (0.66, 1.17) | 0.37 |
| Tap (Unfiltered)                         | 0.94 (0.60, 1.48) | 0.80 | 0.73 (0.46, 1.16) | 0.18 |
